# Supplementary material for: Influence of Sequence Changes and Environment on Intrinsically Disordered Proteins
Source: PLoS Comput Biol. 2009 Sep 4;5(9):e1000497. doi: 10.1371/journal.pcbi.1000497 (PMC2727479; doi:10.1371/journal.pcbi.1000497)
Supplement: Table S3 — The number of pairs for each group of experimental conditions. (0.02 MB XLSX) [file pcbi.1000497.s004.xlsx]

## Sheet: TableS3a
Experiment 1	Experiment 2	Number of unique pairs used for O/D overlap calculation	DO Overlap (%)	O Overlap (%)
T-high	T-high	1630(375)	78.7729	98.9869
T-high	T-low	1939(290)	47.0896	98.2205
T-low	T-low	7219(1264)	66.0588	98.4493
T-low	T-high	1113(227)	56.2842	98.5363
S-high	S-high	1899(503)	72.8448	98.6559
S-high	S-low	387(116)	53.3243	97.9082
S-low	S-low	964(263)	79.7763	99.0066
S-low	S-high	509(139)	52.095	98.3775
P-high	P-high	5676(1069)	68.4438	98.6594
P-high	P-low	1240(328)	43.0699	97.538
P-low	P-low	3144(612)	72.2042	98.7024
P-low	P-high	1441(327)	44.0339	97.4529
Same conditions
Mean DO overlap	73.0168
Mean O overlap	98.7434
Different conditions
Mean DO overlap	49.3162
Mean O overlap	98.0056

## Sheet: TableS3b
Experiment 1	Experiment 2	Number of unique pairs used for O/D overlap calculation	DO Overlap (%)	O Overlap (%)
T-highP-high	T-highP-high	964(264)	81.5293	99.2049
T-highP-high	T-lowP-low	262(72)	38.6847	98.1011
T-highP-low	T-highP-low	551(130)	78.4568	99.1779
T-highP-low	T-lowP-high	351(71)	41.0218	98.4044
T-lowP-high	T-lowP-high	4524(923)	69.4923	98.6772
T-lowP-high	T-highP-low	145(52)	49.1634	98.6079
T-lowP-low	T-lowP-low	2638(541)	73.9324	98.7394
T-lowP-low	T-highP-high	182(50)	53.8657	98.2019
T-highS-high	T-highS-high	339(113)	85.4317	99.0489
T-highS-high	T-lowS-low	48(21)	45.8852	98.5384
T-highS-low	T-highS-low	237(62)	86.1007	99.3317
T-highS-low	T-lowS-high	73(23)	45.7419	98.5932
T-lowS-high	T-lowS-high	1451(419)	74.51	98.7068
T-lowS-high	T-highS-low	51(19)	55.8613	98.3381
T-lowS-low	T-lowS-low	744(216)	79.9236	99.041
T-lowS-low	T-highS-high	44(18)	48.0081	98.6069
P-highS-high	P-highS-high	1099(338)	74.2395	98.6579
P-highS-high	P-lowS-low	64(26)	48.4776	97.9218
P-highS-low	P-highS-low	701(186)	81.3874	99.1611
P-highS-low	P-lowS-high	102(36)	31.795	98.3699
P-lowS-high	P-lowS-high	742(207)	79.7522	99.0508
P-lowS-high	P-highS-low	41(24)	43.4759	98.1109
P-lowS-low	P-lowS-low	268(89)	80.9282	98.876
P-lowS-low	P-highS-high	96(28)	48.3961	98.4189
Same conditions
Mean DO overlap	78.807
Mean O overlap	98.9728
Different conditions
Mean DO overlap	45.8647
Mean O overlap	98.3511

## Sheet: TableS3c
Experiment 1	Experiment 2	Number of unique pairs used for O/D overlap calculation	DO Overlap (%)	O Overlap (%)
T-highP-highS-high	T-highP-highS-high	212(74)	87.7974	99.0513
T-highP-highS-high	T-lowP-lowS-low	3(1)	66.6667	100
T-highP-highS-low	T-highP-highS-low	141(41)	87.6716	99.3164
T-highP-highS-low	T-lowP-lowS-high	14(7)	36.0955	99.5522
T-highP-lowS-high	T-highP-lowS-high	125(44)	86.3874	99.1175
T-highP-lowS-high	T-lowP-highS-low	13(8)	27.8052	97.7102
T-highP-lowS-low	T-highP-lowS-low	91(20)	82.7493	99.359
T-highP-lowS-low	T-lowP-highS-high	25(7)	59.4725	98.4154
T-lowP-highS-high	T-lowP-highS-high	874(279)	75.0024	98.6813
T-lowP-highS-high	T-highP-lowS-low	19(8)	48.6055	97.986
T-lowP-highS-low	T-lowP-highS-low	554(151)	81.1124	99.1503
T-lowP-highS-low	T-highP-lowS-high	9(4)	46.9423	97.5451
T-lowP-lowS-high	T-lowP-lowS-high	594(173)	81.5605	99.125
T-lowP-lowS-high	T-highP-highS-low	7(3)	78.3201	99.4155
T-lowP-lowS-low	T-lowP-lowS-low	187(70)	84.7875	99.0648
T-lowP-lowS-low	T-highP-highS-high	5(3)	33.3333	99.5122
Same conditions
Mean DO overlap	83.3836
Mean O overlap	99.1082
Different conditions
Mean DO overlap	49.6551
Mean O overlap	98.7671
